# Supplementary material for: Out of the ocean: the timescale of molluscan evolution based on phylogenomics revealed the ages of mollusks’ evolutionary transitions into the novel environment
Source: Frontiers journal article supplement (doi:10.3389/fevo.2024.1327007), 2024-02-12
Supplement: Table_2.XLSX [file Table_2.XLSX]

## Sheet: Sheet1
Table S2: The information of the best-fit model of each gene.
Gene ID	Begin	End	Best-fitmodel
108764at33208	1	1153	Q.insect+I+G4
111746at33208	1154	2290	Q.insect+I+G4
115878at33208	2291	3771	Q.insect+R5
129179at33208	3772	4649	Q.insect+I+I+R5
157138at33208	4650	5702	Q.insect+F+R5
177858at33208	5703	6625	Q.insect+I+I+R4
197549at33208	6626	7516	Q.insect+R4
201397at33208	7517	8504	Q.insect+R5
216563at33208	8505	9233	Q.insect+I+I+R5
218441at33208	9234	10871	Q.plant+F+R6
239149at33208	10872	11546	Q.insect+I+I+R4
255242at33208	11547	12237	Q.insect+G4
257141at33208	12238	12906	Q.insect+I+I+R5
266469at33208	12907	13977	Q.yeast+F+R6
295556at33208	13978	16599	Q.insect+F+R5
302279at33208	16600	17008	Q.insect+I+I+R4
302921at33208	17009	18288	JTT+F+I+I+R4
311438at33208	18289	18751	Q.insect+I+G4
331186at33208	18752	20074	Q.yeast+R5
333062at33208	20075	20588	Q.insect+R4
334272at33208	20589	22454	Q.pfam+F+R5
344338at33208	22455	22964	Q.yeast+F+I+G4
344346at33208	22965	23618	Q.insect+I+I+R5
345959at33208	23619	24241	Q.insect+I+G4
351226at33208	24242	24951	Q.insect+R4
360379at33208	24952	25820	Q.insect+I+G4
361100at33208	25821	26244	Q.insect+R4
367596at33208	26245	28010	Q.insect+I+G4
368670at33208	28011	28666	Q.insect+F+I+G4
372257at33208	28667	29116	Q.insect+I+G4
376982at33208	29117	29489	Q.insect+R3
382262at33208	29490	31338	JTTDCMut+F+I+I+R5
395919at33208	31339	33154	Q.insect+R6
395948at33208	33155	35589	Q.insect+F+R4
399439at33208	35590	36283	Q.pfam+F+R4
401679at33208	36284	38068	Q.insect+I+I+R5
40200at33208	38069	40476	JTTDCMut+F+R6
409186at33208	40477	41763	Q.insect+F+R6
412370at33208	41764	42305	Q.insect+R4
413334at33208	42306	42814	Q.insect+I+I+R5
424646at33208	42815	43312	Q.insect+F+R4
428754at33208	43313	44158	Q.insect+F+I+G4
435253at33208	44159	44934	Q.insect+I+G4
438433at33208	44935	45306	Q.insect+G4
439736at33208	45307	45970	Q.insect+G4
440493at33208	45971	46651	Q.insect+I+I+R5
454911at33208	46652	47901	Q.insect+R5
457777at33208	47902	48360	Q.insect+R4
458974at33208	48361	49105	Q.insect+F+R5
460044at33208	49106	49637	Q.insect+R4
468757at33208	49638	50900	Q.insect+I+I+R5
481557at33208	50901	51480	Q.insect+R5
490961at33208	51481	52025	Q.insect+F+R5
493913at33208	52026	52625	Q.insect+I+I+R4
495389at33208	52626	52928	Q.yeast+G4
496070at33208	52929	53488	Q.insect+G4
502584at33208	53489	53897	WAG+F+I+G4
504912at33208	53898	54287	Q.insect+R4
514727at33208	54288	55197	Q.pfam+F+I+I+R5
515058at33208	55198	55791	Q.insect+R5
515377at33208	55792	56204	Q.insect+R5
524322at33208	56205	56566	Q.pfam+I+G4
526839at33208	56567	57067	Q.pfam+F+I+I+R4
539360at33208	57068	57327	Q.insect+I+G4
544919at33208	57328	58039	Q.insect+I+I+R5
546305at33208	58040	58360	Q.insect+R4
548444at33208	58361	58754	Q.insect+I+G4
549988at33208	58755	59160	Q.insect+I+G4
551620at33208	59161	59800	Q.insect+R4
553585at33208	59801	60814	Q.insect+G4
556461at33208	60815	61047	Q.yeast+I+G4
556750at33208	61048	61487	Q.insect+I+G4
556925at33208	61488	62451	Q.pfam+F+R5
557292at33208	62452	63045	Q.yeast+I+I+R5
557834at33208	63046	64224	Q.insect+F+I+I+R6
559501at33208	64225	64569	Q.insect+I+G4
559732at33208	64570	64835	Q.yeast+I+G4
560566at33208	64836	65256	Q.insect+I+G4
562780at33208	65257	65636	Q.yeast+I+I+R5
566026at33208	65637	67532	Q.insect+F+G4
567809at33208	67533	67753	Q.insect+R4
570717at33208	67754	68092	Q.insect+G4
571149at33208	68093	68286	Q.insect+G4
573203at33208	68287	69196	Q.insect+I+G4
577929at33208	69197	69440	Q.pfam+R4
581779at33208	69441	70159	Q.insect+I+I+R5
589773at33208	70160	71297	Q.insect+F+R4
596973at33208	71298	71600	JTT+I+G4
597023at33208	71601	72678	Q.insect+I+G4
601875at33208	72679	74396	Q.insect+F+R4
601967at33208	74397	74624	Q.insect+I+G4
604943at33208	74625	74777	Q.insect+I+G4
605189at33208	74778	74937	Q.insect+I+G4
608669at33208	74938	75588	Q.insect+I+G4
610541at33208	75589	75840	Q.insect+R5
613580at33208	75841	76646	LG+F+R5
615840at33208	76647	77080	Q.insect+I+I+R3
622560at33208	77081	77262	Q.insect+I+I+R3
629763at33208	77263	77362	Q.insect+I+G4
631107at33208	77363	78885	LG+R6
634446at33208	78886	78998	Q.insect+I+I+R3
640187at33208	78999	79546	Q.insect+I+G4
641073at33208	79547	80663	WAG+F+I+I+R4
642323at33208	80664	80859	Q.insect+R4
642552at33208	80860	81073	WAG+F+I+G4
643954at33208	81074	81339	LG+R4
648301at33208	81340	81646	Q.insect+I+I+R4
