# Supplementary material for: Out of the ocean: the timescale of molluscan evolution based on phylogenomics revealed the ages of mollusks’ evolutionary transitions into the novel environment
Source: Frontiers journal article supplement (doi:10.3389/fevo.2024.1327007), 2024-02-12
Supplement: Table_3.docx [file Table_3.docx]

**Table S3.** The fossil constraints used in PAML *mcmctree* divergence time estimation.

| Calibration nodes | Fossil calibration | Date range (Ma) | | Reference |
| --- | --- | --- | --- | --- |
| Min | Max |
| Mollusca: Aculifera, Conchifera | *Oelandiella* | 530.7 | 538.8 | (Song et al., 2023) |
| *Potamilus streckersoni*, *Chlamys farreri* | *Glyptarca* | 477.08 | 497.0 | (Song et al., 2023) |
| *Nautilus*, *Octopus* | *Devonobactrites emsiense* | 394.3 | 486.9 | (Song et al., 2023) |
| *Octopus*, *Euprymna* | *Tohokubelus takaizumii* | 246.7 | 359.3 | (Song et al., 2023) |
| *Haliotis*, *Pomacea* | *unnamed larval gastropod shells* | 469.42 | 497.0 | (Song et al., 2023) |
| *Pomacea*, *Biomphalaria* | Kuskokwimia *moorei* | 394.3 | 477.08 | (Song et al., 2023) |
| Unionida, Cardiida | *Silesunionidae* | 208.5 | 237.0 | (Skawina and Dzik, 2011) |
| Ampullariidae, Batillariidae | *Reesidella robusta, R. rinra* | 145.0 | 163.5 | (Hayes et al., 2009) |
| Planorbidae, Lymnaeidae | *Lymnaea morrisonensis* | 152.1 | 157.3 | (Gray, 1988) |

Gray, J., (1988). Evolution of the freshwater ecosystem: The fossil record. *Palaeogeography, Palaeoclimatology, Palaeoecology* 62, 1-214. doi:<https://doi.org/10.1016/0031-0182(88)90054-5>

Hayes, K.A., Cowie, R.H., Thiengo, S.C., (2009). A global phylogeny of apple snails: Gondwanan origin, generic relationships, and the influence of outgroup choice (Caenogastropoda: Ampullariidae). *Biological Journal of the Linnean Society* 98, 61-76. doi:10.1111/j.1095-8312.2009.01246.x

Skawina, A., Dzik, J., (2011). Umbonal musculature and relationships of the Late Triassic filibranch unionoid bivalves. *Zoological Journal of the Linnean Society* 163, 863-883.

Song, H., Wang, Y., Shao, H., Li, Z., Hu, P., Yap-Chiongco, M., Shi, P., Zhang, T., Li, C., Wang, Y., Peizhen, M., Vinther, J., Wang, H., Kocot, K., (2023). Scaphopoda is the sister taxon to Bivalvia: Evidence of ancient incomplete lineage sorting. *Proceedings of the National Academy of Sciences* 120. doi:10.1073/pnas.2302361120

Huiji Wang, (1954) Two upper jurassic gastropod opercula in China. *Acta Palaeontogica* ***Sinica* 23(3): 369-372.**
